# Supplementary material for: Theoretical study of the dark photochemistry of 1,3-butadiene via the chemiexcitation of Dewar dioxetane
Source: Royal Society of Chemistry journal article supplement (doi:10.1039/c5cp02269j), 2015-01-01

## ***Supporting Information***

*(Total of 13 pages)  
for*

# **Theoretical Study of the Dark Photochemistry of 1,3-Butadiene via the Chemiexcitation of Dewar Dioxetane**

Pooria Farahani,<sup>\*,†,‡</sup> Marcus Lundberg,<sup>†</sup> Roland Lindh,<sup>†,¶</sup> and Daniel  
Roca-Sanjuán<sup>\*,‡</sup>

<sup>†</sup>*Department of Chemistry – Ångström, Uppsala University, P.O. Box 518, SE-751 20 Uppsala, Sweden*

<sup>‡</sup>*Instituto de Ciencia Molecular, Universitat de València, P.O. Box 22085, ES-46071  
València, Spain*

<sup>¶</sup>*Uppsala Center for Computational Chemistry, Uppsala University, P.O. Box  
518, SE-751 20 Uppsala, Sweden*

E-mail: [Pooria.Farahani@kemi.uu.se](mailto:Pooria.Farahani@kemi.uu.se), [Daniel.Roca@uv.es](mailto:Daniel.Roca@uv.es)

March 18, 2015

---

\* To whom correspondence should be addressed

† Uppsala

‡ València

¶ UC<sub>3</sub>

## Table of contents

|                                                                                                                                                                                                                           |     |
|---------------------------------------------------------------------------------------------------------------------------------------------------------------------------------------------------------------------------|-----|
| <b>Table S1.</b> Cartesian coordinates (in Å) of the optimized Dewar dioxetane structures at the CASSCF/ANO-RCC-VDZP level of theory.....                                                                                 | S3  |
| <b>Table S2.</b> Energies (in kcal/mol) of the low-lying singlet and triplet states at the optimized geometries of Dewar dioxetane relative to the ground-state energy of the reactant (Reac).....                        | S8  |
| <b>Table S3.</b> Zero-point vibrational energies (in kcal/mol) of the low-lying singlet and triplet states at the optimized geometries of Dewar dioxetane relative to the ground-state energy of the reactant (Reac)..... | S9  |
| <b>Table S4.</b> Gibbs free energies (in kcal/mol) of the low-lying singlet and triplet states at the optimized geometries of Dewar dioxetane relative to the ground-state energy of the reactant (Reac).....             | S10 |
| <b>Table S5.</b> Relative electronic, zero-point vibrational and Gibbs free energies (kcal/mol) of the main stationary structures of the thermal decomposition of the Dewar dioxetane.....                                | S11 |
| <b>Table S6.</b> Spin-orbit interactions ( $\text{cm}^{-1}$ ) of the main transition states.....                                                                                                                          | S12 |
| <b>Figure S1.</b> CASPT2/ANO-RCC-VTZP//CASSCF/ANO-RCC-VDZP MEP computed on the $S_0$ state from a geometry after the $\text{Min}_{S_1}/\text{Min}_{T_1}$ ( $\text{TS}_{T_1}$ ).....                                       | S13 |

**Table S1.** Cartesian coordinates (in Å) of the optimized Dewar dioxetane structures at the CASSCF/ANO-RCC-VDZP level of theory.

**Reactant:**

|   |             |             |             |
|---|-------------|-------------|-------------|
| H | -0.10601967 | -2.49925566 | 0.12950332  |
| C | -0.10434255 | 1.44351792  | 0.00537897  |
| C | 1.20502232  | 0.77416577  | 0.22820401  |
| C | 1.23697894  | -0.75668867 | 0.14037256  |
| C | -0.09048461 | -1.42532236 | 0.07338887  |
| C | -1.20187852 | -0.73289068 | -0.06905159 |
| C | -1.20529267 | 0.73441401  | -0.13817978 |
| H | -0.12216081 | 2.51758128  | -0.03610816 |
| H | 2.01155072  | 1.25039747  | -0.31147186 |
| H | 1.93217316  | -1.16800074 | -0.57946433 |
| H | -2.14930221 | -1.23701627 | -0.13347696 |
| H | -2.14828159 | 1.22399125  | -0.30271245 |
| O | 1.85411933  | -0.83837654 | 1.47874714  |
| O | 1.56892116  | 0.71349319  | 1.66232626  |

**TS<sub>S0</sub>:**

|   |             |             |             |
|---|-------------|-------------|-------------|
| H | -0.07937550 | -2.48201790 | 0.30082462  |
| C | -0.09824899 | 1.43417859  | -0.02819354 |
| C | 1.18358633  | 0.78284286  | 0.38417202  |
| C | 1.25251950  | -0.73748625 | 0.12042603  |
| C | -0.07766082 | -1.41620016 | 0.15747943  |
| C | -1.19329834 | -0.74308496 | -0.02877777 |
| C | -1.18620312 | 0.71400543  | -0.21364168 |
| H | -0.10726866 | 2.50318812  | -0.13586208 |
| H | 2.04600349  | 1.26874111  | -0.05119435 |
| H | 1.76123583  | -0.95410507 | -0.81520867 |
| H | -2.14213719 | -1.24799729 | -0.04244322 |
| H | -2.10918290 | 1.19070122  | -0.49148377 |
| O | 2.14527879  | -1.16955776 | 1.16260612  |
| O | 1.28575459  | 0.85680206  | 1.82875289  |

**Min<sub>S1</sub>:**

|   |             |             |             |
|---|-------------|-------------|-------------|
| H | -0.07908801 | -2.49010474 | 0.31420129  |
| C | -0.12525031 | 1.41840006  | -0.01013810 |
| C | 1.13358683  | 0.78192408  | 0.50159753  |
| C | 1.22333821  | -0.72134292 | 0.08372621  |
| C | -0.09361950 | -1.42850289 | 0.14648204  |

|   |             |             |             |
|---|-------------|-------------|-------------|
| C | -1.21260020 | -0.76353361 | -0.05216965 |
| C | -1.19842682 | 0.69101753  | -0.25322102 |
| H | -0.14122993 | 2.48889897  | -0.10120308 |
| H | 2.01909464  | 1.28642189  | 0.13237468  |
| H | 1.58601125  | -0.74088582 | -0.94474300 |
| H | -2.16182391 | -1.26776671 | -0.06004257 |
| H | -2.10782870 | 1.16507132  | -0.57711730 |
| O | 2.24655714  | -1.37223939 | 0.80920804  |
| O | 1.17729007  | 0.95629710  | 1.91274415  |

**Min<sub>T1</sub> :**

|   |             |             |             |
|---|-------------|-------------|-------------|
| H | -0.07784424 | -2.49011934 | 0.30709967  |
| C | -0.12674920 | 1.41857568  | -0.00654236 |
| C | 1.13589469  | 0.78325003  | 0.49913877  |
| C | 1.22451084  | -0.72106554 | 0.08705271  |
| C | -0.09314598 | -1.42792045 | 0.14360530  |
| C | -1.21248185 | -0.76353367 | -0.05358316 |
| C | -1.19972477 | 0.69144903  | -0.25010198 |
| H | -0.14300395 | 2.48915793  | -0.09603173 |
| H | 2.01570288  | 1.29098269  | 0.12041907  |
| H | 1.59417010  | -0.74730925 | -0.93908519 |
| H | -2.16090918 | -1.26917440 | -0.06418966 |
| H | -2.10956300 | 1.16600715  | -0.57199006 |
| O | 2.23868982  | -1.38214558 | 0.81683529  |
| O | 1.18046461  | 0.96550061  | 1.90907255  |

**TS<sub>s1</sub> :**

|   |             |             |             |
|---|-------------|-------------|-------------|
| H | -0.15053172 | -2.54541652 | 0.41432172  |
| C | -0.12961157 | 1.45658099  | 0.00759276  |
| C | 1.11748408  | 0.94170467  | 0.63203119  |
| C | 1.29799745  | -0.98425229 | -0.05261980 |
| C | -0.07786071 | -1.50817029 | 0.14092407  |
| C | -1.17903031 | -0.76888824 | -0.02284651 |
| C | -1.14890124 | 0.67412122  | -0.28785555 |
| H | -0.18524994 | 2.51788608  | -0.16489957 |
| H | 2.04422171  | 1.35902287  | 0.26897848  |
| H | 1.52450312  | -0.58973213 | -1.03814793 |
| H | -2.14775675 | -1.22106866 | 0.09235904  |
| H | -2.03392490 | 1.11365270  | -0.71388054 |
| O | 2.25857530  | -1.45767851 | 0.63313015  |
| O | 1.07609622  | 1.01589299  | 1.99261172  |

**TS<sub>T1</sub>:**

|   |             |             |             |
|---|-------------|-------------|-------------|
| H | -0.13119706 | -2.45682873 | 0.54502297  |
| C | -0.13598664 | 1.49473450  | -0.04748257 |
| C | 1.12476827  | 1.06799778  | 0.65031673  |
| C | 1.24168741  | -0.81019499 | 0.08500868  |
| C | -0.09575233 | -1.42334585 | 0.25070334  |
| C | -1.18769732 | -0.72307634 | 0.02686553  |
| C | -1.15624179 | 0.70228058  | -0.31227768 |
| H | -0.19899367 | 2.54260651  | -0.28950824 |
| H | 2.04521377  | 1.34932452  | 0.14650244  |
| H | 1.53032602  | -0.64320861 | -0.94825926 |
| H | -2.15085914 | -1.19378871 | 0.10832254  |
| H | -2.03904949 | 1.11664821  | -0.76654271 |
| O | 2.23181633  | -1.46028293 | 0.71549653  |
| O | 1.15138571  | 1.05365509  | 1.90789265  |

**Z,Z-2,4-Hexadienedial<sub>s0</sub> (p):**

|   |             |             |             |
|---|-------------|-------------|-------------|
| H | 0.09456516  | -2.62671783 | 0.90398521  |
| C | 0.10266517  | 1.90190288  | 0.11791848  |
| C | -0.19130982 | 2.43574759  | 1.46062655  |
| C | 0.51033687  | -2.30544908 | -1.17477305 |
| C | 0.21646858  | -1.83713370 | 0.18371747  |
| C | 0.09051107  | -0.55877394 | 0.58631663  |
| C | 0.22461316  | 0.61560044  | -0.26156560 |
| H | 0.22949991  | 2.66019496  | -0.63557052 |
| H | -0.24925478 | 3.52322170  | 1.51537209  |
| H | 0.64836664  | -1.57076858 | -1.96381192 |
| H | -0.12733038 | -0.38077471 | 1.61994397  |
| H | 0.44216320  | 0.45343030  | -1.30092484 |
| O | 0.60267302  | -3.47886731 | -1.43883610 |
| O | -0.36454775 | 1.78490832  | 2.45966259  |

**Z,Z-2,4-Hexadienedial<sub>s0</sub> (t):**

|   |            |            |            |
|---|------------|------------|------------|
| H | -0.3657560 | -2.5512646 | 0.8370547  |
| C | -0.0653022 | 1.6910302  | -0.1352129 |
| C | 0.9352944  | 1.7867469  | 0.9466935  |
| C | 1.2433022  | -1.6242598 | -0.2576920 |
| C | -0.1026301 | -1.6396715 | 0.3304634  |
| C | -0.9973253 | -0.6485296 | 0.2505005  |
| C | -0.8666550 | 0.6560130  | -0.4242595 |
| H | -0.1882004 | 2.5955695  | -0.7068158 |

|   |            |            |            |
|---|------------|------------|------------|
| H | 1.1738214  | 2.8034081  | 1.2620440  |
| H | 1.5394303  | -0.7455158 | -0.8223392 |
| H | -1.9731277 | -0.8218413 | 0.6757051  |
| H | -1.5866480 | 0.8154444  | -1.2119138 |
| O | 1.9977534  | -2.5574302 | -0.1480572 |
| O | 1.4854629  | 0.8568217  | 1.4758902  |

**E,Z-2,4-Hexadienedial<sub>S0</sub> :**

|   |            |            |            |
|---|------------|------------|------------|
| H | -0.6249095 | -2.7323779 | -0.7409783 |
| C | 0.2731305  | 1.3425527  | -0.0086558 |
| C | 0.6000130  | 2.6469245  | 0.6040388  |
| C | 1.2323954  | -1.9002524 | -0.0350879 |
| C | -0.2078480 | -1.8343860 | -0.3204217 |
| C | -1.0115100 | -0.7975878 | -0.0442510 |
| C | -0.6280255 | 0.5053821  | 0.5181232  |
| H | 0.7814011  | 1.1026979  | -0.9267513 |
| H | 1.2189199  | 3.3162994  | 0.0066321  |
| H | 1.6862927  | -1.0647968 | 0.4907927  |
| H | -2.0664612 | -0.9201828 | -0.2291715 |
| H | -1.1554540 | 0.8161954  | 1.4045313  |
| O | 1.9021936  | -2.8541670 | -0.3430886 |
| O | 0.2292830  | 2.9902198  | 1.6963491  |

**E,Z-2,4-Hexadienedial<sub>T1</sub><sup>3</sup>(ππ\* ):**

|   |           |           |           |
|---|-----------|-----------|-----------|
| H | -0.409675 | -2.756115 | 0.147366  |
| C | 0.153060  | 1.460559  | -0.208842 |
| C | 0.892748  | 2.054414  | 0.864128  |
| C | 1.315183  | -1.548503 | -0.161595 |
| C | -0.107616 | -1.730202 | 0.038744  |
| C | -1.106048 | -0.750108 | 0.102809  |
| C | -1.034047 | 0.622680  | 0.003566  |
| H | 0.443547  | 1.712425  | -1.214721 |
| H | 1.719496  | 2.706351  | 0.592120  |
| H | 1.706967  | -0.544559 | -0.281526 |
| H | -2.098953 | -1.136549 | 0.257266  |
| H | -1.963824 | 1.159418  | 0.093827  |
| O | 2.077007  | -2.490192 | -0.203015 |
| O | 0.641576  | 1.856902  | 2.041934  |

**Z,Z-2,4-Hexadienedial<sub>S1</sub><sup>1</sup>(nπ\* ):**

|   |           |           |           |
|---|-----------|-----------|-----------|
| H | -0.291169 | -2.611278 | 0.671193  |
| C | -0.094513 | 1.637376  | -0.045346 |
| C | 0.913608  | 1.678492  | 0.940541  |
| C | 1.277176  | -1.545814 | -0.348084 |
| C | -0.069134 | -1.659287 | 0.222310  |
| C | -1.015126 | -0.708968 | 0.188340  |
| C | -0.926498 | 0.646000  | -0.374835 |
| H | -0.195654 | 2.565311  | -0.580926 |
| H | 1.534892  | 2.532099  | 1.122421  |
| H | 1.530677  | -0.636781 | -0.883748 |
| H | -1.986417 | -0.969252 | 0.579013  |
| H | -1.674652 | 0.873768  | -1.115825 |
| O | 2.100874  | -2.448962 | -0.254424 |
| O | 1.161944  | 0.650951  | 1.781067  |

**Z,Z-2,4-Hexadienedial<sub>T1</sub><sup>3</sup>(nπ\* ):**

|   |             |             |             |
|---|-------------|-------------|-------------|
| H | -0.28648188 | -2.61110363 | 0.68367320  |
| C | -0.09002660 | 1.63974487  | -0.04552067 |
| C | 0.89720287  | 1.68784604  | 0.96100197  |
| C | 1.27131779  | -1.56086283 | -0.36821722 |
| C | -0.06522602 | -1.66270147 | 0.22682450  |
| C | -1.00515011 | -0.70628318 | 0.19967088  |
| C | -0.91394627 | 0.64189175  | -0.38072063 |
| H | -0.18197874 | 2.56358342  | -0.58931295 |
| H | 1.51123912  | 2.54767108  | 1.14418312  |
| H | 1.52767506  | -0.64886686 | -0.89776253 |
| H | -1.97262635 | -0.95741732 | 0.60598365  |
| H | -1.64980374 | 0.85823623  | -1.13718922 |
| O | 2.08399791  | -2.47749469 | -0.30312804 |
| O | 1.13981496  | 0.68941160  | 1.80221092  |

**Table S2.** Energies (in kcal/mol) of the low-lying singlet and triplet states at the optimized geometries of Dewar dioxetane relative to the ground-state energy of the reactant (Reac).

|                                          | Reac   | TS <sub>s0</sub> | Min <sub>s1</sub> | Min <sub>T1</sub> | TS <sub>s1</sub> | TS <sub>T1</sub> | Z,Z-Hexa <sub>s0</sub> (p) | Z,Z-Hexa <sub>s0</sub> (t) | E,Z-Hexa <sub>s0</sub> | E,Z-Hexa <sub>T1</sub> | Z,Z-Hexa <sub>s1</sub> | Z,Z-Hexa <sub>T1</sub> |
|------------------------------------------|--------|------------------|-------------------|-------------------|------------------|------------------|----------------------------|----------------------------|------------------------|------------------------|------------------------|------------------------|
| CASSCF/ANO-RCC-VDZP                      |        |                  |                   |                   |                  |                  |                            |                            |                        |                        |                        |                        |
| S <sub>0</sub>                           | 0.00   | 13.89            | 11.19             | 11.22             | 3.74             | 3.97             | -47.89                     | -65.64                     | -68.65                 | -21.88                 | -45.95                 | -51.07                 |
| S <sub>1</sub>                           | 79.55  | 19.04            | 14.33             | 14.40             | 33.32            | 32.26            | 31.92                      | 26.64                      | 23.11                  | 19.95                  | 4.82                   | -0.63                  |
| S <sub>2</sub>                           | 130.02 | 21.54            | 15.16             | 15.19             | 49.83            | 47.04            | 90.82                      | 29.00                      | 23.70                  | 30.50                  | 42.67                  | 72.60                  |
| S <sub>3</sub>                           | 156.02 | 25.14            | 17.13             | 17.22             | 54.90            | 51.68            | 91.46                      | 93.20                      | 82.59                  | 49.91                  | 74.99                  | 92.05                  |
| T <sub>1</sub>                           | 61.68  | 16.63            | 11.20             | 11.20             | 30.39            | 29.58            | 11.06                      | 16.23                      | 10.86                  | -22.21                 | 2.62                   | -5.91                  |
| T <sub>2</sub>                           | 116.29 | 19.06            | 14.67             | 14.71             | 42.27            | 41.19            | 16.46                      | 17.79                      | 17.69                  | 19.54                  | 12.51                  | 15.80                  |
| T <sub>3</sub>                           | 123.23 | 21.64            | 14.79             | 14.85             | 48.16            | 45.47            | 47.50                      | 25.95                      | 18.55                  | 31.58                  | 35.82                  | 31.95                  |
| T <sub>4</sub>                           | 175.98 | 26.25            | 17.92             | 18.02             | 53.75            | 50.45            | 76.41                      | 66.20                      | 23.66                  | 49.13                  | 37.07                  | 75.59                  |
| CASPT2/ANO-RCC-VTZP//CASSCF/ANO-RCC-VDZP |        |                  |                   |                   |                  |                  |                            |                            |                        |                        |                        |                        |
| S <sub>0</sub>                           | 0.00   | 25.21            | 21.46             | 21.51             | -4.28            | -4.53            | -70.47                     | -62.34                     | -64.43                 | -16.04                 | -46.37                 | -49.74                 |
| S <sub>1</sub>                           | 71.65  | 28.32            | 22.74             | 22.78             | 32.09            | 30.52            | 6.87                       | 19.80                      | 16.78                  | 16.56                  | 7.28                   | 8.06                   |
| S <sub>2</sub>                           | 124.31 | 31.26            | 23.72             | 23.78             | 48.08            | 45.03            | 56.50                      | 28.82                      | 18.15                  | 26.19                  | 33.18                  | 77.49                  |
| S <sub>3</sub>                           | 154.17 | 36.16            | 28.30             | 28.42             | 59.64            | 55.77            | 49.37                      | 78.22                      | 70.55                  | 54.07                  | 69.48                  | 100.15                 |
| T <sub>1</sub>                           | 50.71  | 25.68            | 21.82             | 21.84             | 30.15            | 29.01            | -1.34                      | 15.63                      | 11.62                  | -15.16                 | 3.31                   | 5.01                   |
| T <sub>2</sub>                           | 113.90 | 29.92            | 25.96             | 26.08             | 47.88            | 46.42            | 1.83                       | 20.08                      | 11.34                  | 17.19                  | 18.06                  | 32.28                  |
| T <sub>3</sub>                           | 116.59 | 31.83            | 25.88             | 25.89             | 47.87            | 45.27            | 33.14                      | 30.43                      | 12.29                  | 28.84                  | 28.10                  | 36.00                  |



**Table S3.** Zero-point vibrational energies (in kcal/mol) of the low-lying singlet and triplet states at the optimized geometries of Dewar dioxetane relative to the ground-state energy of the reactant (Reac).

|                | Reac                | TS <sub>S0</sub> | Min <sub>S1</sub> | Min <sub>T1</sub> | TS <sub>S1</sub> | TS <sub>T1</sub> | Z,Z-Hexa <sub>S0</sub> (p) | Z,Z-Hexa <sub>S0</sub> (t) | E,Z-Hexa <sub>S0</sub> | E,Z-Hexa <sub>T1</sub> | Z,Z-Hexa <sub>S1</sub> | Z,Z-Hexa <sub>T1</sub> |
|----------------|---------------------|------------------|-------------------|-------------------|------------------|------------------|----------------------------|----------------------------|------------------------|------------------------|------------------------|------------------------|
|                | CASSCF/ANO-RCC-VDZP |                  |                   |                   |                  |                  |                            |                            |                        |                        |                        |                        |
| S <sub>0</sub> | 0.00                | 12.55            | 9.66              | 10.00             | -0.46            | -0.08            | -49.98                     | -68.54                     | -71.65                 | -26.67                 | -49.34                 | -55.37                 |
| S <sub>1</sub> | 79.55               | 17.70            | 12.80             | 13.18             | 29.13            | 28.20            | 29.82                      | 23.74                      | 20.11                  | 15.15                  | 1.42                   | -4.93                  |
| S <sub>2</sub> | 130.02              | 20.19            | 13.64             | 13.97             | 45.63            | 42.98            | 88.72                      | 26.10                      | 20.70                  | 25.71                  | 39.27                  | 68.30                  |
| S <sub>3</sub> | 156.02              | 23.80            | 15.60             | 16.00             | 50.70            | 47.62            | 89.36                      | 90.30                      | 79.59                  | 45.12                  | 71.59                  | 87.75                  |
| T <sub>1</sub> | 61.68               | 15.29            | 9.67              | 9.98              | 26.19            | 25.52            | 8.96                       | 13.33                      | 7.86                   | -27.01                 | -0.78                  | -10.21                 |
| T <sub>2</sub> | 116.29              | 17.71            | 13.14             | 13.49             | 38.07            | 37.13            | 14.36                      | 14.90                      | 14.69                  | 14.74                  | 9.11                   | 11.50                  |
| T <sub>3</sub> | 123.23              | 20.30            | 13.27             | 13.63             | 43.96            | 41.42            | 45.40                      | 23.05                      | 15.55                  | 26.79                  | 32.42                  | 27.65                  |
| T <sub>4</sub> | 175.98              | 24.90            | 16.39             | 16.80             | 49.56            | 46.39            | 74.31                      | 63.30                      | 20.66                  | 44.34                  | 33.68                  | 71.29                  |

**Table S4.** Gibbs free energies (in kcal/mol) of the low-lying singlet and triplet states at the optimized geometries of Dewar dioxetane relative to the ground-state energy of the reactant (Reac).

|                | Reac                | TS <sub>S0</sub> | Min <sub>S1</sub> | Min <sub>T1</sub> | TS <sub>S1</sub> | TS <sub>T1</sub> | Z,Z-Hexa <sub>S0</sub> (p) | Z,Z-Hexa <sub>S0</sub> (t) | E,Z-Hexa <sub>S0</sub> | E,Z-Hexa <sub>T1</sub> | Z,Z-Hexa <sub>S1</sub> | Z,Z-Hexa <sub>T1</sub> |
|----------------|---------------------|------------------|-------------------|-------------------|------------------|------------------|----------------------------|----------------------------|------------------------|------------------------|------------------------|------------------------|
|                | CASSCF/ANO-RCC-VDZP |                  |                   |                   |                  |                  |                            |                            |                        |                        |                        |                        |
| S <sub>0</sub> | 0.00                | 12.81            | 9.56              | 9.80              | -0.89            | -0.43            | -52.22                     | -70.27                     | -73.78                 | -28.71                 | -50.48                 | -57.00                 |
| S <sub>1</sub> | 79.55               | 17.96            | 12.70             | 12.98             | 28.69            | 27.86            | 27.59                      | 22.01                      | 17.98                  | 13.12                  | 0.29                   | -6.56                  |
| S <sub>2</sub> | 130.02              | 20.46            | 13.53             | 13.76             | 45.20            | 42.63            | 86.49                      | 24.37                      | 18.57                  | 23.67                  | 38.14                  | 66.67                  |
| S <sub>3</sub> | 156.02              | 24.06            | 15.50             | 15.79             | 50.27            | 47.27            | 87.13                      | 88.57                      | 77.46                  | 43.08                  | 70.46                  | 86.12                  |
| T <sub>1</sub> | 61.68               | 15.55            | 9.57              | 9.78              | 25.76            | 25.17            | 6.73                       | 11.60                      | 5.73                   | -29.04                 | -1.91                  | -11.84                 |
| T <sub>2</sub> | 116.29              | 17.97            | 13.04             | 13.29             | 37.64            | 36.78            | 12.13                      | 13.16                      | 12.56                  | 12.71                  | 7.98                   | 9.87                   |
| T <sub>3</sub> | 123.23              | 20.56            | 13.16             | 13.42             | 43.53            | 41.07            | 43.17                      | 21.32                      | 13.42                  | 24.75                  | 31.29                  | 26.02                  |
| T <sub>4</sub> | 175.98              | 25.16            | 16.29             | 16.59             | 49.12            | 46.04            | 72.08                      | 61.57                      | 18.53                  | 42.30                  | 32.54                  | 69.66                  |

**Table S5.** Relative electronic, zero-point vibrational and Gibbs free energies (kcal/mol) of the main stationary structures of the thermal decomposition of the Dewar dioxetane.

|                                               | ZPVE | Gibbs |
|-----------------------------------------------|------|-------|
| <b>REACT</b>                                  | 72.2 | 53.0  |
| <b>TS<sub>S0</sub></b>                        | 70.8 | 51.9  |
| <b>Min<sub>S1</sub></b>                       | 70.9 | 51.6  |
| <b>Min<sub>T1</sub></b>                       | 70.6 | 51.4  |
| <b>TS<sub>S1</sub></b>                        | 68.0 | 48.4  |
| <b>TS<sub>T1</sub></b>                        | 68.1 | 48.6  |
| <b>Z,Z-2,4-Hexadienedial<sub>S0</sub> (p)</b> | 70.1 | 48.7  |
| <b>Z,Z-2,4-Hexadienedial<sub>S0</sub> (t)</b> | 69.3 | 48.4  |
| <b>E,Z-2,4-Hexadienedial<sub>S0</sub></b>     | 69.2 | 47.9  |
| <b>E,Z-2,4-Hexadienedial<sub>T1</sub></b>     | 67.4 | 46.2  |
| <b>Z,Z-2,4-Hexadienedial<sub>S1</sub></b>     | 68.8 | 48.5  |
| <b>Z,Z-2,4-Hexadienedial<sub>T1</sub></b>     | 67.9 | 47.1  |

**Table S6.** Spin-orbit interactions ( $\text{cm}^{-1}$ ) of the main transition states.

| State 1       | State 2       | $\langle \Psi_1   H_{SO}   \Psi_2 \rangle$ ( $\text{cm}^{-1}$ ) |                   |                   |
|---------------|---------------|-----------------------------------------------------------------|-------------------|-------------------|
|               |               | $\text{TS}_{S_0}$                                               | $\text{TS}_{S_1}$ | $\text{TS}_{T_1}$ |
| $T_1(M_s=-1)$ | $S_0(M_s=0)$  | 17.142                                                          | 2.600             | 40.538            |
| $T_1(M_s=0)$  | $S_0(M_s=0)$  | 12.754                                                          | 66.113            | 30.505            |
| $T_1(M_s=1)$  | $S_0(M_s=0)$  | 17.142                                                          | 2.600             | 40.538            |
| $T_2(M_s=-1)$ | $S_0(M_s=0)$  | 13.891                                                          | 30.781            | 5.024             |
| $T_2(M_s=0)$  | $S_0(M_s=0)$  | 2.55                                                            | 26.360            | 60.114            |
| $T_2(M_s=1)$  | $S_0(M_s=0)$  | 13.891                                                          | 30.781            | 5.024             |
| $T_1(M_s=-1)$ | $S_1(M_s=0)$  | 9.083                                                           | >1.000            | 4.193             |
| $T_1(M_s=0)$  | $S_1(M_s=0)$  | 45.312                                                          | 3.506             | 3.492             |
| $T_1(M_s=1)$  | $S_1(M_s=0)$  | 9.083                                                           | >1.000            | 4.193             |
| $T_2(M_s=-1)$ | $S_1(M_s=0)$  | 20.775                                                          | 3.448             | 4.173             |
| $T_2(M_s=0)$  | $S_1(M_s=0)$  | 80.219                                                          | 38.850            | 6.451             |
| $T_2(M_s=1)$  | $S_1(M_s=0)$  | 20.775                                                          | 3.448             | 4.173             |
| $T_1(M_s=-1)$ | $S_2(M_s=0)$  | 11.874                                                          | 4.263             | >1.000            |
| $T_1(M_s=0)$  | $S_2(M_s=0)$  | 3.613                                                           | 3.228             | 9.620             |
| $T_1(M_s=1)$  | $S_2(M_s=0)$  | 11.874                                                          | 4.263             | >1.000            |
| $T_2(M_s=-1)$ | $S_2(M_s=0)$  | 21.333                                                          | 18.886            | 1.006             |
| $T_2(M_s=0)$  | $S_2(M_s=0)$  | 6.716                                                           | 20.754            | 30.840            |
| $T_2(M_s=1)$  | $S_2(M_s=0)$  | 21.333                                                          | 18.886            | 1.006             |
| $T_2(M_s=-1)$ | $T_1(M_s=-1)$ | 71.9                                                            | 42.347            | 12.731            |
| $T_2(M_s=0)$  | $T_1(M_s=-1)$ | 21.552                                                          | 1.896             | 4.548             |
| $T_2(M_s=1)$  | $T_1(M_s=0)$  | 21.552                                                          | 1.896             | 4.548             |
| $T_2(M_s=-1)$ | $T_1(M_s=0)$  | 21.552                                                          | 1.896             | 4.458             |
| $T_2(M_s=0)$  | $T_1(M_s=1)$  | 21.552                                                          | 1.896             | 4.458             |
| $T_2(M_s=1)$  | $T_1(M_s=1)$  | 71.9                                                            | 42.347            | 12.731            |

**Figure S1.** CASPT2/ANO-RCC-VTZP//CASSCF/ANO-RCC-VDZP MEP computed on the  $S_0$  state from a geometry after the  $\text{Min}_{S1}/\text{Min}_{T1}$  ( $\text{TS}_{T1}$ ).

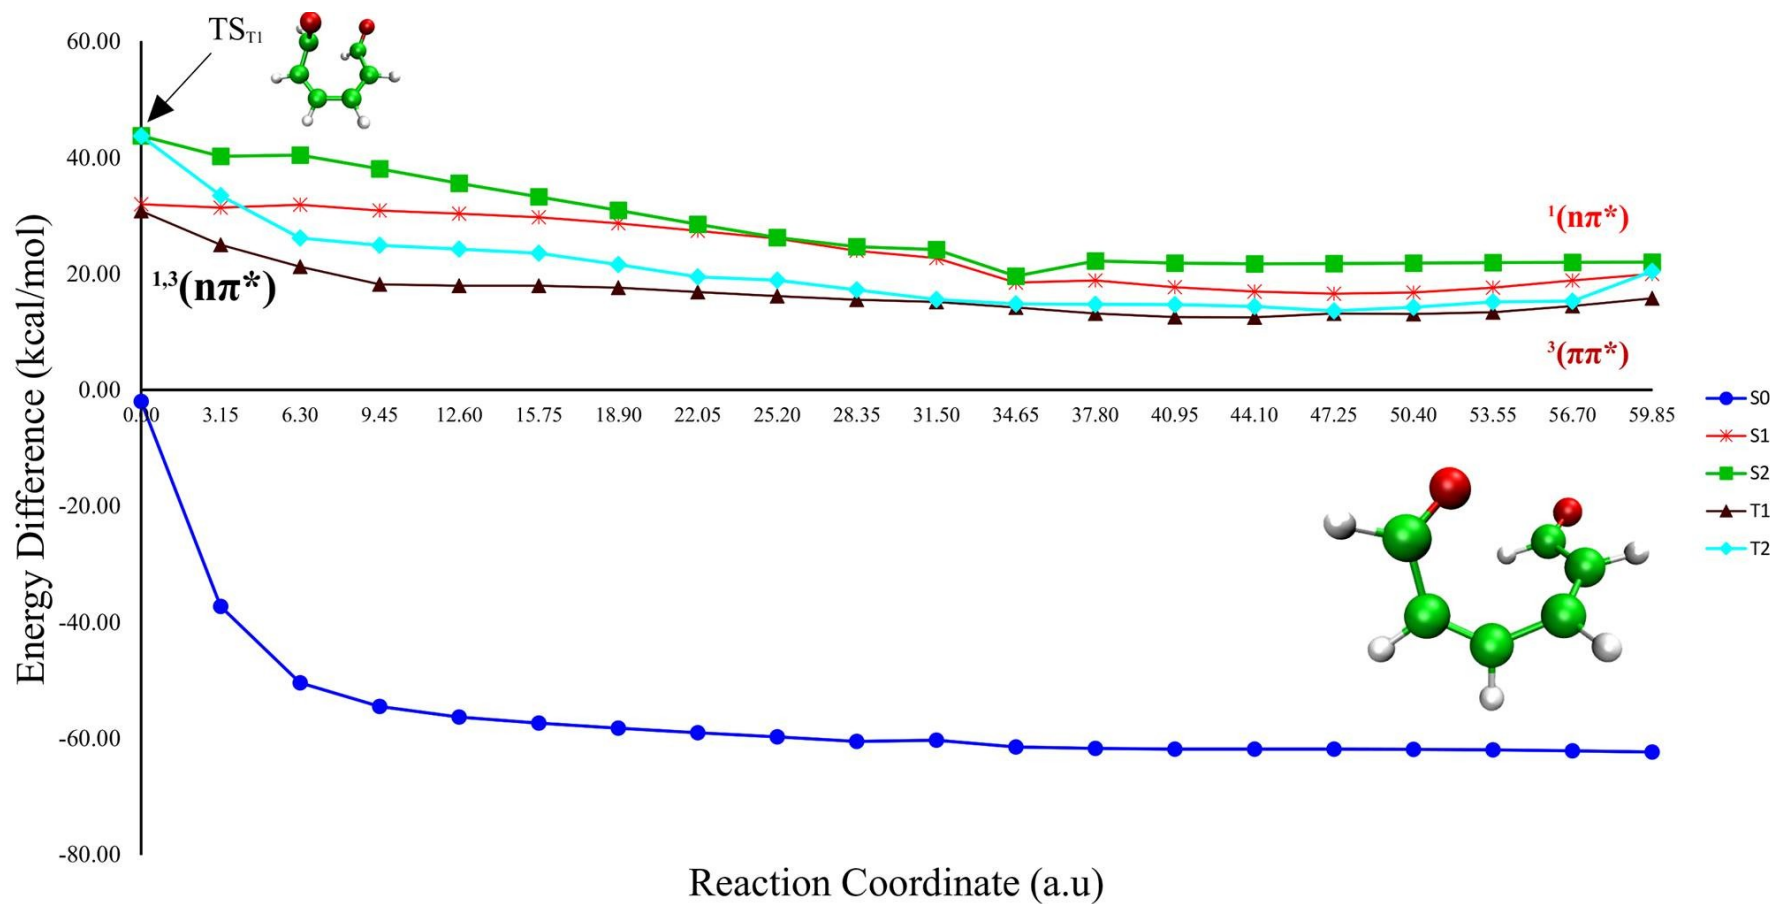

Supplement: c5cp02269j1.pdf [file c5cp02269j1.pdf]
